# Supplementary material for: Signatures of differential selection in chloroplast genome between japonica and indica
Source: Rice (N Y). 2019 Aug 14;12:65. doi: 10.1186/s12284-019-0322-x (PMC6692809; doi:10.1186/s12284-019-0322-x)
Supplement: Supplementary file 2 — Table S2. Summary of the total variant among the subgroups. (XLSX 15 kb) [file 12284_2019_322_MOESM2_ESM.xlsx]

## Sheet: chloroplast genome variation
Chloroplast Variation
Name	Samples	Deletion	Insertion	Snp	Other	Transitions	Transversions	Ts/Tv	Total Variation	Average Variation
All_accessions	412	333	637	2867	6	1831	1036	1.76737	3843	9.32767
wild	54	329	631	2836	6	1813	1023	1.77224	3802	70.4074
cultivated	358	45	66	123	0	56	67	0.835821	234	0.653631
Te_japonica	253	36	50	75	0	26	49	0.530612	161	0.636364
Tr_japonica	25	32	45	61	0	20	41	0.487805	138	5.52
Indica	66	41	55	97	0	42	55	0.763636	193	2.92424
Aus	9	42	58	97	0	44	53	0.830189	197	21.8889
Aromatic	2	33	46	64	0	22	42	0.52381	143	71.5
Admixture	3	34	41	62	0	21	41	0.512195	137	45.6667
O.nivara	3	42	56	101	0	43	58	0.741379	199	66.3333
O.rufipogon	3	40	59	106	0	42	64	0.65625	205	68.3333
O.longistaminata	3	43	60	135	0	67	68	0.985294	238	79.3333
O.officinalis	3	63	174	462	0	262	200	1.31	699	233
O.eichingeri	3	65	174	452	1	259	193	1.34197	692	230.667
O.barthii	3	39	60	109	0	43	66	0.651515	208	69.3333
O.alta	3	68	182	491	1	282	209	1.34928	742	247.333
O.australiensis	2	89	167	709	0	433	276	1.56884	965	482.5
O.brachyantha	2	185	245	1495	3	944	551	1.71325	1928	964
O.glumaepatula	3	42	65	127	0	65	62	1.04839	234	78
O.grandiglumis	3	62	162	433	0	246	187	1.31551	657	219
O.latifolia	3	66	167	451	1	255	196	1.30102	685	228.333
O.longiglumis	2	129	246	1283	3	865	418	2.06938	1661	830.5
O.malampuzhaensis	3	56	145	508	0	301	207	1.45411	709	236.333
O.meridionalis	2	40	61	127	0	54	73	0.739726	228	114
O.minuta	2	56	143	493	0	293	200	1.465	692	346
O.punctata	3	75	225	638	1	380	258	1.47287	939	313
O.rhizomatis	3	63	176	485	2	283	202	1.40099	726	242
O.glaberrima	3	40	70	126	0	53	73	0.726027	236	78.6667
O.ridleyi	1	113	230	1236	2	843	393	2.14504	1581	1581
O.malabarensis	1	59	169	444	0	257	187	1.37433	672	672

## Sheet: High quality chloroplast 
Hight Quality Chloroplast variation
Name	Samples	Deletion	Insertion	Snp	Other	Transitions	Transversions	Ts/Tv	Total Variation	Average Variation
All_acc	412	95	121	1172	1	746	426	1.75117	1389	3.37136
wild	54	93	118	1162	1	738	424	1.74057	1374	25.4444
cultivated	358	14	16	52	0	32	20	1.6	82	0.22905
Te_japonica	253	7	8	17	0	9	8	1.125	32	0.126482
Tr_japonica	25	3	6	11	0	5	6	0.833333	20	0.8
Indica	66	12	12	43	0	27	16	1.6875	67	1.01515
Aus	9	12	13	44	0	27	17	1.58824	69	7.66667
Aromatic	2	4	5	13	0	7	6	1.16667	22	11
Admixture	3	5	4	12	0	6	6	1	21	7
O.nivara	3	12	12	40	0	23	17	1.35294	64	21.3333
O.rufipogon	3	11	12	40	0	21	19	1.10526	63	21
O.longistaminata	3	11	11	54	0	29	25	1.16	77	25.6667
O.officinalis	3	30	57	400	0	244	156	1.5641	487	162.333
O.eichingeri	3	30	57	397	0	243	154	1.57792	484	161.333
O.barthii	3	9	9	36	0	20	16	1.25	54	18
O.alta	3	36	62	430	0	261	169	1.54438	528	176
O.australiensis	2	30	43	370	0	234	136	1.72059	443	221.5
O.brachyantha	2	55	42	809	1	529	280	1.88929	907	453.5
O.glumaepatula	3	7	11	43	0	23	20	1.15	61	20.3333
O.grandiglumis	3	31	54	381	0	231	150	1.54	466	155.333
O.latifolia	3	27	53	364	0	223	141	1.58156	444	148
O.longiglumis	2	49	51	825	1	544	281	1.93594	926	463
O.malampuzhaensis	3	24	47	435	0	270	165	1.63636	506	168.667
O.meridionalis	2	9	10	44	0	22	22	1	63	31.5
O.minuta	2	25	47	432	0	269	163	1.65031	504	252
O.punctata	3	40	80	566	0	348	218	1.59633	686	228.667
O.rhizomatis	3	30	51	386	0	239	147	1.62585	467	155.667
O.glaberrima	3	9	10	38	0	20	18	1.11111	57	19
O.ridleyi	1	48	48	815	1	539	276	1.9529	912	912
O.malabarensis	1	28	56	395	0	243	152	1.59868	479	479
