# Supplementary material for: Signatures of differential selection in chloroplast genome between japonica and indica
Source: Rice (N Y). 2019 Aug 14;12:65. doi: 10.1186/s12284-019-0322-x (PMC6692809; doi:10.1186/s12284-019-0322-x)
Supplement: Supplementary file 6 — Table S6 Reduction of nucleotide diversity between indica and japonica in the cp genome. (XLSX 16 kb) [file 12284_2019_322_MOESM6_ESM.xlsx]

## Sheet: π of 6 subgroups
CHROM	BIN_START	BIN_START	πw/πind	πw/πjap
CP_NC_001320.1	1	1000	5.91828	25.5453
CP_NC_001320.1	501	1500	229.935	0
CP_NC_001320.1	1001	2000	0	0
CP_NC_001320.1	1501	2500	266.19	0
CP_NC_001320.1	2001	3000	278.287	0
CP_NC_001320.1	2501	3500	160.048	0
CP_NC_001320.1	3001	4000	129.65	0
CP_NC_001320.1	3501	4500	552.938	0
CP_NC_001320.1	4001	5000	22.5123	137.044
CP_NC_001320.1	4501	5500	8.21604	51.3206
CP_NC_001320.1	5001	6000	19.2393	123.281
CP_NC_001320.1	5501	6500	16.3134	101.421
CP_NC_001320.1	6001	7000	8.90622	54.9827
CP_NC_001320.1	6501	7500	7.54988	45.9507
CP_NC_001320.1	7001	8000	15.9301	96.9744
CP_NC_001320.1	7501	8500	15.7411	103.89
CP_NC_001320.1	8001	9000	6.62929	41.6471
CP_NC_001320.1	8501	9500	7.92705	48.5458
CP_NC_001320.1	11501	12500	20.0563	83.0397
CP_NC_001320.1	12001	13000	4.35457	18.0294
CP_NC_001320.1	12501	13500	3.27687	14.331
CP_NC_001320.1	13001	14000	20.3966	129.442
CP_NC_001320.1	13501	14500	14.5901	71.9329
CP_NC_001320.1	14001	15000	14.8266	71.5458
CP_NC_001320.1	14501	15500	280.669	0
CP_NC_001320.1	15001	16000	29.1923	199.922
CP_NC_001320.1	15501	16500	32.6412	207.15
CP_NC_001320.1	16001	17000	28.6609	195.475
CP_NC_001320.1	16501	17500	18.3433	57.9915
CP_NC_001320.1	17001	18000	10.3855	38.0071
CP_NC_001320.1	17501	18500	6.76207	41.156
CP_NC_001320.1	18001	19000	15.3711	93.553
CP_NC_001320.1	18501	19500	17.3858	105.836
CP_NC_001320.1	19001	20000	0	0
CP_NC_001320.1	22001	23000	0	0
CP_NC_001320.1	22501	23500	0	0
CP_NC_001320.1	23501	24500	0	0
CP_NC_001320.1	24001	25000	0	0
CP_NC_001320.1	24501	25500	0	0
CP_NC_001320.1	25501	26500	0	0
CP_NC_001320.1	26001	27000	0	0
CP_NC_001320.1	26501	27500	0	0
CP_NC_001320.1	27501	28500	30.1494	183.534
CP_NC_001320.1	28001	29000	21.3844	130.177
CP_NC_001320.1	28501	29500	14.9392	61.8531
CP_NC_001320.1	29001	30000	13.3178	55.1402
CP_NC_001320.1	29501	30500	0	0
CP_NC_001320.1	30001	31000	0	0
CP_NC_001320.1	30501	31500	0	0
CP_NC_001320.1	31001	32000	0	0
CP_NC_001320.1	31501	32500	0	0
CP_NC_001320.1	32001	33000	0	72.3682
CP_NC_001320.1	32501	33500	0	91.2568
CP_NC_001320.1	33001	34000	0	0
CP_NC_001320.1	33501	34500	0	0
CP_NC_001320.1	34001	35000	0	0
CP_NC_001320.1	34501	35500	7.65284	31.6853
CP_NC_001320.1	35001	36000	10.4706	43.3519
CP_NC_001320.1	35501	36500	0	0
CP_NC_001320.1	36001	37000	0	0
CP_NC_001320.1	36501	37500	0	0
CP_NC_001320.1	37001	38000	0	0
CP_NC_001320.1	39001	40000	0	0
CP_NC_001320.1	39501	40500	0	0
CP_NC_001320.1	41001	42000	298.968	0
CP_NC_001320.1	41501	42500	334.444	0
CP_NC_001320.1	42001	43000	0	0
CP_NC_001320.1	42501	43500	0	0
CP_NC_001320.1	43001	44000	13.8633	13.3525
CP_NC_001320.1	43501	44500	20.6159	19.8563
CP_NC_001320.1	44001	45000	0	31.6046
CP_NC_001320.1	44501	45500	0	8.11043
CP_NC_001320.1	45001	46000	0	18.9226
CP_NC_001320.1	45501	46500	7.37409	14.8405
CP_NC_001320.1	46001	47000	5.60884	13.5127
CP_NC_001320.1	46501	47500	8.9858	54.6902
CP_NC_001320.1	47001	48000	11.2098	17.2599
CP_NC_001320.1	47501	48500	14.5194	12.0411
CP_NC_001320.1	48501	49500	31.1076	0
CP_NC_001320.1	49001	50000	48.8221	72.0495
CP_NC_001320.1	49501	50500	24.7028	75.174
CP_NC_001320.1	50001	51000	10.4486	127.211
CP_NC_001320.1	50501	51500	13.6647	83.184
CP_NC_001320.1	51001	52000	6.14467	47.009
CP_NC_001320.1	51501	52500	2.6439	20.2268
CP_NC_001320.1	52001	53000	7.39627	47.5782
CP_NC_001320.1	52501	53500	9.06358	0
CP_NC_001320.1	53001	54000	136.012	71.2817
CP_NC_001320.1	53501	54500	14.1167	60.9324
CP_NC_001320.1	54001	55000	10.4386	0
CP_NC_001320.1	54501	55500	3.07154	0
CP_NC_001320.1	55001	56000	5.51989	33.8226
CP_NC_001320.1	55501	56500	12.806	53.3278
CP_NC_001320.1	56001	57000	4.29251	18.4763
CP_NC_001320.1	56501	57500	6.1289	3.38574
CP_NC_001320.1	57001	58000	4.19207	2.68231
CP_NC_001320.1	57501	58500	15.231	92.7187
CP_NC_001320.1	58001	59000	0	0
CP_NC_001320.1	58501	59500	0	0
CP_NC_001320.1	59001	60000	0	0
CP_NC_001320.1	59501	60500	0	0
CP_NC_001320.1	60001	61000	7.84778	47.7638
CP_NC_001320.1	60501	61500	13.0392	79.3602
CP_NC_001320.1	61001	62000	0	0
CP_NC_001320.1	61501	62500	0	0
CP_NC_001320.1	62001	63000	3.57572	21.7629
CP_NC_001320.1	62501	63500	6.42487	39.1038
CP_NC_001320.1	63001	64000	0	0
CP_NC_001320.1	63501	64500	17.6436	107.406
CP_NC_001320.1	64001	65000	14.2393	86.6814
CP_NC_001320.1	64501	65500	0	41.5446
CP_NC_001320.1	65001	66000	22.8936	0
CP_NC_001320.1	65501	66500	8.17079	22.1345
CP_NC_001320.1	66001	67000	10.4668	76.7229
CP_NC_001320.1	66501	67500	42.815	0
CP_NC_001320.1	67001	68000	0	0
CP_NC_001320.1	68001	69000	0	0
CP_NC_001320.1	68501	69500	6.51261	39.6455
CP_NC_001320.1	69001	70000	6.11745	37.2399
CP_NC_001320.1	69501	70500	0	0
CP_NC_001320.1	70001	71000	0	0
CP_NC_001320.1	70501	71500	0	0
CP_NC_001320.1	71001	72000	0	0
CP_NC_001320.1	71501	72500	0	0
CP_NC_001320.1	72001	73000	0	0
CP_NC_001320.1	72501	73500	0	0
CP_NC_001320.1	73001	74000	0	0
CP_NC_001320.1	73501	74500	6.90868	40.3042
CP_NC_001320.1	74001	75000	9.65897	8.99184
CP_NC_001320.1	74501	75500	64.1431	12.075
CP_NC_001320.1	75001	76000	12.244	74.535
CP_NC_001320.1	75501	76500	6.17595	31.2367
CP_NC_001320.1	76001	77000	7.02623	10.4397
CP_NC_001320.1	76501	77500	10.2469	10.0743
CP_NC_001320.1	77001	78000	10.0609	61.6259
CP_NC_001320.1	77501	78500	6.29986	9.49509
CP_NC_001320.1	78001	79000	12.3083	12.0713
CP_NC_001320.1	78501	79500	18.2352	0
CP_NC_001320.1	79001	80000	15.9359	0
CP_NC_001320.1	79501	80500	0	0
CP_NC_001320.1	80001	81000	11.2449	13.6432
CP_NC_001320.1	80501	81500	4.61585	5.6003
CP_NC_001320.1	101501	102500	0	0
CP_NC_001320.1	102001	103000	9.84921	59.957
CP_NC_001320.1	102501	103500	7.93339	48.2944
CP_NC_001320.1	103001	104000	151.005	0
CP_NC_001320.1	103501	104500	19.6967	134.891
CP_NC_001320.1	104001	105000	14.0699	21.6636
CP_NC_001320.1	104501	105500	32.0061	26.543
CP_NC_001320.1	105001	106000	16.928	98.7557
CP_NC_001320.1	105501	106500	6.18137	29.8282
CP_NC_001320.1	106001	107000	13.3167	16.2423
CP_NC_001320.1	106501	107500	0	24.7179
CP_NC_001320.1	107001	108000	0	0
CP_NC_001320.1	107501	108500	12.1467	50.2913
CP_NC_001320.1	108001	109000	15.0934	62.4917
CP_NC_001320.1	108501	109500	14.2224	58.8854
CP_NC_001320.1	109001	110000	11.9567	49.5049
CP_NC_001320.1	109501	110500	0	0
CP_NC_001320.1	110001	111000	0	0
CP_NC_001320.1	110501	111500	0	0
CP_NC_001320.1	111001	112000	216.178	0
CP_NC_001320.1	111501	112500	211.124	0
CP_NC_001320.1	112001	113000	0	0
CP_NC_001320.1	112501	113500	14.5116	88.3393
CP_NC_001320.1	113001	114000	10.3587	63.0582
