# Supplementary material for: Signatures of differential selection in chloroplast genome between japonica and indica
Source: Rice (N Y). 2019 Aug 14;12:65. doi: 10.1186/s12284-019-0322-x (PMC6692809; doi:10.1186/s12284-019-0322-x)
Supplement: Supplementary file 7 — Table S7. IAM, TPM and SMM hypothesis of selection events. (XLSX 10 kb) [file 12284_2019_322_MOESM7_ESM.xlsx]

## Sheet: Sheet1
Population bottleneck analyses in indica temperate japonica and tropical japonica
Population name	Sample size				Probility of mutation-drift equilibrium
		IAM	TPM	SMM	IAM	TPM	SMM
Indica	66	7.55	8.22	8.54	0.13038	0.03979	0.02263
Temperate japonica	253	5.93	6.52	6.88	.	0.0001	0.00113
Tropical japonica	25	13.03	13.26	14.06	0.0047	0.00022	2e-05
