# Supplementary material for: Signatures of differential selection in chloroplast genome between japonica and indica
Source: Rice (N Y). 2019 Aug 14;12:65. doi: 10.1186/s12284-019-0322-x (PMC6692809; doi:10.1186/s12284-019-0322-x)
Supplement: Supplementary file 8 — Table S8. Allele frequency information of indica, temperate japonica and tropical japonica. (XLSX 23 kb) [file 12284_2019_322_MOESM8_ESM.xlsx]

## Sheet: Indica_allele_frequency
Indica allele frequency
CHROM	POS	N_ALLELES	N_CHR	{ALLELE	FREQ}	{ALLELE	FREQ}	{ALLELE	FREQ}	{ALLELE	FREQ}	{ALLELE	FREQ}	{ALLELE	FREQ}	{ALLELE	FREQ}
CP_NC_001320.1	57051	4	132	TAAAAA	0.00757576	TAAA	0	TAAAA	0.992424	*	0
CP_NC_001320.1	8547	2	132	AGAATCCTATTTTTGTTCTTATACCCATGCAATAGAGAGCGAGTGGGAAAAGGGAGGTTACTT	0.00757576	A	0.992424
CP_NC_001320.1	8615	2	132	CATTTTTT	0.00757576	C	0.992424
CP_NC_001320.1	55667	3	130	AAAAAG	0.0615385	*	0.938462	A	0
CP_NC_001320.1	51349	4	132	T	0.0757576	C	0	A	0.924242	G	0
CP_NC_001320.1	76220	5	132	GAAAA	0.0757576	GAA	0	GAAA	0.924242	GA	0	G	0
CP_NC_001320.1	16670	3	132	G	0.0757576	GA	0.909091	GAA	0.0151515
CP_NC_001320.1	5005	2	132	A	0.0757576	AATCCTTT	0.924242
CP_NC_001320.1	55664	2	132	TGAAAAA	0.0757576	T	0.924242
CP_NC_001320.1	56588	2	132	T	0.0757576	C	0.924242
CP_NC_001320.1	57039	3	132	ACTAAAGTATTCTAAAAAAAAAGTATTCTATAAAAAAT	0.0833333	A	0	*	0.916667
CP_NC_001320.1	52147	2	132	C	0.0833333	T	0.916667
CP_NC_001320.1	57027	3	132	TTTTTTTAGAATACTAA	0.0833333	T	0.916667	*	0
CP_NC_001320.1	78411	7	132	CTTTTTT	0.136364	CTT	0.00757576	CTTT	0	CTTTT	0.280303	CTTTTT	0.575758	C	0	CT	0
CP_NC_001320.1	48536	2	132	C	0.909091	T	0.0909091
CP_NC_001320.1	57008	4	132	CTTTTTTTTTAGAATACT	0.924242	CTTTTTTTTTTAGAATACT	0	CTTTTTTTTAGAATACT	0	*	0.0757576
CP_NC_001320.1	57009	3	132	TTTTTTTTTAGAATAC	0.924242	T	0	*	0.0757576
CP_NC_001320.1	57017	3	132	TAGAA	0.924242	T	0	*	0.0757576
CP_NC_001320.1	51102	2	132	A	0.924242	G	0.0757576
CP_NC_001320.1	57007	3	132	TCTTTTTTTTTAGAATA	0.924242	T	0.0757576	*	0
CP_NC_001320.1	66541	2	132	C	0.924242	T	0.0757576
CP_NC_001320.1	103774	2	132	A	0.954545	C	0.0454545
CP_NC_001320.1	8436	2	132	C	0.969697	T	0.030303
CP_NC_001320.1	52948	2	132	C	0.969697	A	0.030303
CP_NC_001320.1	6246	3	130	C	0.984615	T	0	*	0.0153846
CP_NC_001320.1	16356	4	132	AGGG	0.984848	AGG	0	*	0	AGGGG	0.0151515
CP_NC_001320.1	53328	3	132	CA	0.984848	CAA	0	C	0.0151515
CP_NC_001320.1	982	2	132	A	0.984848	T	0.0151515
CP_NC_001320.1	6423	2	132	A	0.984848	C	0.0151515
CP_NC_001320.1	41827	2	132	A	0.984848	T	0.0151515

## Sheet: Temperate japonica allele freq
Indica allele frequency
CHROM	POS	N_ALLELES	N_CHR	{ALLELE	FREQ}	{ALLELE1	FREQ}1	{ALLELE	FREQ}	{ALLELE2	FREQ}2
CP_NC_001320.1	79470	2	506	C	0.549407	T	0.450593
CP_NC_001320.1	78411	7	506	CTTTTTT	0.58498	CTT	0.0375494	CTTT	0	CTTTT	0.00790514	CTTTTT	0.365613	C	0.00197628	CT	0.00197628
CP_NC_001320.1	80598	7	506	CTT	0.628458	CTTT	0.359684	CTTTT	0.00790514	CTTTTT	0	CTTTTTT	0	CT	0.00395257	C	0
CP_NC_001320.1	76562	3	506	ATT	0.666008	A	0.00592885	AT	0.328063
CP_NC_001320.1	47716	2	506	A	0.66996	C	0.33004
CP_NC_001320.1	104514	2	506	C	0.675889	CAACA	0.324111
CP_NC_001320.1	43898	5	506	TAAA	0.715415	TAA	0.284585	TAAAA	0	TAAAAA	0	T	0
CP_NC_001320.1	46183	4	506	GTT	0.715415	G	0	GT	0.0158103	GTTT	0.268775
CP_NC_001320.1	74907	2	506	C	0.721344	T	0.278656
CP_NC_001320.1	57069	3	506	T	0.735178	A	0.229249	*	0.0355731
CP_NC_001320.1	65607	6	506	ATT	0.786561	AT	0	A	0	ATTT	0.213439	ATTTT	0	AATTT	0
CP_NC_001320.1	6765	2	506	A	0.79249	T	0.20751
CP_NC_001320.1	17355	5	506	CTTTCTA	0.79249	C	0	CTACTATTTTCTA	0	*	0	CTTTCTATTTCTA	0.20751
CP_NC_001320.1	57051	4	506	TAAAAA	0.91502	TAAA	0	TAAAA	0.0494071	*	0.0355731
CP_NC_001320.1	17380	4	506	GAAA	0.938735	GTAAA	0	GAA	0	*	0.0612648
CP_NC_001320.1	55664	2	506	TGAAAAA	0.956522	T	0.0434783
CP_NC_001320.1	55667	3	506	AAAAAG	0.956522	*	0.0434783	A	0
CP_NC_001320.1	106849	2	506	G	0.956522	A	0.0434783
CP_NC_001320.1	57027	3	506	TTTTTTTAGAATACTAA	0.960474	T	0.00395257	*	0.0355731
CP_NC_001320.1	57039	3	506	ACTAAAGTATTCTAAAAAAAAAGTATTCTATAAAAAAT	0.960474	A	0	*	0.0395257
CP_NC_001320.1	3535	7	506	TAA	0.964427	TA	0.0355731	TAAA	0	TAAAAA	0	TAAAAAA	0	T	0	TAAAAAAAAAA	0
CP_NC_001320.1	16498	2	506	C	0.964427	CGTGGAA	0.0355731
CP_NC_001320.1	16840	3	506	A	0.964427	C	0	G	0.0355731
CP_NC_001320.1	44795	2	506	C	0.972332	T	0.027668
CP_NC_001320.1	57008	4	506	CTTTTTTTTTAGAATACT	0.972332	CTTTTTTTTTTAGAATACT	0	CTTTTTTTTAGAATACT	0.00197628	*	0.0256917
CP_NC_001320.1	57009	3	506	TTTTTTTTTAGAATAC	0.972332	T	0	*	0.027668
CP_NC_001320.1	76220	5	506	GAAAA	0.972332	GAA	0	GAAA	0.027668	GA	0	G	0
CP_NC_001320.1	57007	3	506	TCTTTTTTTTTAGAATA	0.974308	T	0.00395257	*	0.0217391
CP_NC_001320.1	57017	3	506	TAGAA	0.974308	T	0	*	0.0256917
CP_NC_001320.1	56944	2	506	CAAATCTTTTTAATTGCTTCTCCTTTTTTGCTATTTTCTTATTATTTATATAATCCATTCGATTCTTTTTTTTTAGAATACTTTTTTTTTAGAATACTAAAGTATTCTAAAAAAAAAGTATTCTATAAA	0.978261	C	0.0217391
CP_NC_001320.1	57000	3	506	ATTCGATTCTTTTTTTTTAGAATACTTTTTTTTTAGAATACTAAAGTATTCTAAAAAAAAAGTATTCT	0.978261	AATTCTTTTTTTTTAGAATACTTTTTTTTTAGAATACTAAAGTATTCTAAAAAAAAAGTATTCT	0	*	0.0217391
CP_NC_001320.1	57003	3	506	CGATTCTTTTTTTTTAG	0.978261	C	0	*	0.0217391
CP_NC_001320.1	57005	3	506	ATTCTTTTTTTTTAGAATACTTTTTTTT	0.978261	ATAGAATACTTTTTTTT	0	*	0.0217391
CP_NC_001320.1	57006	3	506	TTCTTTTTTTTTAGAATACTTTTTTTTTAGAATACTAAAGTATTCTAAAAAAAAAGTATTCTATAAAAAA	0.978261	T	0	*	0.0217391
CP_NC_001320.1	45398	2	506	T	0.980237	G	0.0197628
CP_NC_001320.1	53521	2	506	C	0.982213	T	0.0177866
CP_NC_001320.1	57133	2	506	T	0.98419	TA	0.0158103
CP_NC_001320.1	109142	2	506	A	0.98419	G	0.0158103
CP_NC_001320.1	111310	2	506	A	0.98419	AATTATC	0.0158103
CP_NC_001320.1	14231	2	506	A	0.986166	G	0.013834
CP_NC_001320.1	12799	2	506	G	0.988142	A	0.0118577
CP_NC_001320.1	12819	2	506	T	0.988142	C	0.0118577
CP_NC_001320.1	12820	2	506	A	0.988142	C	0.0118577
CP_NC_001320.1	14007	2	506	GAC	0.990119	G	0.00988142
CP_NC_001320.1	29113	2	506	A	0.990119	G	0.00988142
CP_NC_001320.1	108269	2	506	G	0.990119	A	0.00988142
CP_NC_001320.1	412	2	506	T	0.992095	C	0.00790514
CP_NC_001320.1	18461	2	506	C	0.992095	T	0.00790514
CP_NC_001320.1	76527	3	506	T	0.992095	G	0.00790514	*	0
CP_NC_001320.1	76595	2	506	T	0.992095	G	0.00790514
CP_NC_001320.1	76596	2	506	C	0.992095	A	0.00790514
CP_NC_001320.1	46094	3	506	ATATAT	0.994071	A	0.00592885	*	0
CP_NC_001320.1	46099	3	506	TTATATAC	0.994071	T	0	*	0.00592885
CP_NC_001320.1	3098	2	506	C	0.996047	T	0.00395257
CP_NC_001320.1	6282	2	506	T	0.996047	C	0.00395257
CP_NC_001320.1	12667	2	506	TAGGG	0.996047	T	0.00395257
CP_NC_001320.1	12669	3	506	GGGA	0.996047	G	0	*	0.00395257
CP_NC_001320.1	12930	2	506	G	0.996047	A	0.00395257
CP_NC_001320.1	15014	2	506	C	0.996047	T	0.00395257
CP_NC_001320.1	18722	2	506	AATCTTAT	0.996047	A	0.00395257
CP_NC_001320.1	26639	2	506	C	0.996047	A	0.00395257
CP_NC_001320.1	26742	2	506	AGACGAATATAGGACTCGAGAGGAGGAGTATGAAACCCTAGAAGATGAATATGGGATCCCAGAGAACGAATATGAAACCCTAGAAGATGAATATGGAATCCTAGAG	0.996047	A	0.00395257
CP_NC_001320.1	26759	3	506	G	0.996047	T	0	*	0.00395257
CP_NC_001320.1	26766	3	506	G	0.996047	C	0	*	0.00395257
CP_NC_001320.1	26770	3	506	TATG	0.996047	*	0.00395257	T	0
CP_NC_001320.1	26772	3	506	T	0.996047	C	0	*	0.00395257
CP_NC_001320.1	26796	3	506	G	0.996047	A	0	*	0.00395257
CP_NC_001320.1	26805	3	506	G	0.996047	A	0	*	0.00395257
CP_NC_001320.1	26806	3	506	A	0.996047	G	0	*	0.00395257
CP_NC_001320.1	26838	3	506	A	0.996047	G	0	*	0.00395257
CP_NC_001320.1	26842	3	506	C	0.996047	T	0	*	0.00395257
CP_NC_001320.1	39721	2	506	G	0.996047	T	0.00395257
CP_NC_001320.1	44634	2	506	A	0.996047	T	0.00395257
CP_NC_001320.1	63337	3	506	C	0.996047	*	0	T	0.00395257
CP_NC_001320.1	74268	2	506	A	0.996047	C	0.00395257
CP_NC_001320.1	78433	3	506	TCC	0.996047	T	0.00197628	*	0.00197628
CP_NC_001320.1	78680	2	506	G	0.996047	A	0.00395257
CP_NC_001320.1	80628	2	506	T	0.996047	A	0.00395257
CP_NC_001320.1	103830	2	506	C	0.996047	A	0.00395257
CP_NC_001320.1	105774	2	506	TAA	0.996047	T	0.00395257
CP_NC_001320.1	106806	3	506	T	0.996047	C	0	G	0.00395257
CP_NC_001320.1	110846	2	506	G	0.996047	T	0.00395257
CP_NC_001320.1	12496	3	506	A	0.998024	G	0.00197628	C	0
CP_NC_001320.1	35382	2	506	G	0.998024	A	0.00197628
CP_NC_001320.1	49856	3	506	C	0.998024	T	0.00197628	*	0
CP_NC_001320.1	60995	2	506	T	0.998024	G	0.00197628
CP_NC_001320.1	66402	2	506	A	0.998024	G	0.00197628
CP_NC_001320.1	75968	5	506	CTTTTTTTTTTACTTTTTAGAAAGT	0.998024	CTTTTTTTTACTTTTTAGAAAGT	0	CTTTTTTTTTACTTTTTAGAAAGT	0.00197628	CTTTTTTTACTTTTTAGAAAGT	0	*	0
CP_NC_001320.1	76537	2	506	C	0.998024	CTCTCCTATTTTTCTTTTCTGTCATATTTTTTTT	0.00197628
CP_NC_001320.1	106348	2	506	G	0.998024	T	0.00197628
CP_NC_001320.1	113077	2	506	G	0.998024	T	0.00197628

## Sheet: Tropical japonica allele freq
Indica allele frequency
CHROM	POS	N_ALLELES	N_CHR	{ALLELE	FREQ}	{ALLELE1	FREQ}1	{ALLELE	FREQ}	{ALLELE2	FREQ}2
CP_NC_001320.1	80598	7	50	CTT	0.04	CTTT	0.8	CTTTT	0	CTTTTT	0	CTTTTTT	0	CT	0.16	C	0
CP_NC_001320.1	43898	5	50	TAAA	0.4	TAA	0.6	TAAAA	0	TAAAAA	0	T	0
CP_NC_001320.1	47716	2	50	A	0.4	C	0.6
CP_NC_001320.1	74907	2	50	C	0.4	T	0.6
CP_NC_001320.1	104514	2	50	C	0.4	CAACA	0.6
CP_NC_001320.1	57027	3	50	TTTTTTTAGAATACTAA	0.64	T	0.2	*	0.16
CP_NC_001320.1	44795	2	50	C	0.84	T	0.16
CP_NC_001320.1	45398	2	50	T	0.84	G	0.16
CP_NC_001320.1	56944	2	50	CAAATCTTTTTAATTGCTTCTCCTTTTTTGCTATTTTCTTATTATTTATATAATCCATTCGATTCTTTTTTTTTAGAATACTTTTTTTTTAGAATACTAAAGTATTCTAAAAAAAAAGTATTCTATAAA	0.84	C	0.16
CP_NC_001320.1	57133	2	50	T	0.84	TA	0.16
CP_NC_001320.1	78411	7	50	CTTTTTT	0.42	CTT	0.16	CTTT	0	CTTTT	0.04	CTTTTT	0.38	C	0	CT	0
CP_NC_001320.1	106849	2	50	G	0.84	A	0.16
CP_NC_001320.1	17374	2	50	TATATAG	0.96	T	0.04
CP_NC_001320.1	32725	2	50	T	0.96	C	0.04
CP_NC_001320.1	76595	2	50	T	0.96	G	0.04
CP_NC_001320.1	76596	2	50	C	0.96	A	0.04
CP_NC_001320.1	412	2	50	T	0.98	C	0.02
CP_NC_001320.1	12496	3	50	A	0.98	G	0.02	C	0
CP_NC_001320.1	12667	2	50	TAGGG	0.98	T	0.02
CP_NC_001320.1	12799	2	50	G	0.98	A	0.02
CP_NC_001320.1	12819	2	50	T	0.98	C	0.02
CP_NC_001320.1	12820	2	50	A	0.98	C	0.02
CP_NC_001320.1	14007	2	50	GAC	0.98	G	0.02
CP_NC_001320.1	29113	2	50	A	0.98	G	0.02
CP_NC_001320.1	35382	2	50	G	0.98	A	0.02
CP_NC_001320.1	53521	2	50	C	0.98	T	0.02
CP_NC_001320.1	106348	2	50	G	0.98	T	0.02
CP_NC_001320.1	108269	2	50	G	0.98	A	0.02
CP_NC_001320.1	109142	2	50	A	0.98	G	0.02
